# Supplementary material for: Intrinsic quantum efficiency enhancement in well-known Ir(iii) complexes by virtue of a simple and controllable deuteriation strategy
Source: Royal Society of Chemistry journal article supplement (doi:10.1039/c8qm00061a), 2018-01-01
Supplement: c8qm00061a1.pdf [file c8qm00061a1.pdf]

## Supporting Information

Intrinsic quantum efficiency enhancement in famous  
Ir(III) complexes by virtue of the simple and  
controllable deuteration way.

Yu Wang, Fu-Quan Bai,\* and Hong-Xing Zhang \*

*International Joint Research Laboratory of Nano-Micro Architecture  
Chemistry, Laboratory of Theoretical and Computational Chemistry,  
Institute of Theoretical Chemistry,  
Jilin University, 130023, Changchun, People's Republic of China.*

# 1 Spin orbit coupling

The spin orbital coupling matrix elements play an indispensable role in both radiative and non-radiative decay processes. Accordingly, the calculation of SOC integrals is crucial in determination of photophysical property for a phosphor. The one-electron SOC Hamiltonian for heavy transition metals can be expressed as:

$$\hat{H}_{SOC} = \sum_i \hat{l}_i \cdot \hat{s}_i \xi_c \quad (S1)$$

where  $\hat{l}_i$  and  $\hat{s}_i$  are denoted as orbital and spin angular momentum operator for the  $i$ -th electron, respectively.  $\xi_c$  is the one-electron spin-orbital coupling constant. In this study, only iridium  $d$  electrons are considered to be contributing to the SOC strength, since  $\xi_c$  for  $d$  electrons in Ir atom is significantly larger than the other main group atoms. Further simplified one-center one-electron direct SOC integrals are reducing to products of the normalized configuration interaction coefficients ( ${}^1a_i$  and  ${}^3a_j$ ) of  $S_n$  and  $T_m$  excitation states, the atomic orbital coefficients ( ${}^1c_k$  and  ${}^3c_k$ ) of iridium  ${}^1d_k$  and  ${}^3d_k$  involved in correlative excitation states, as well as its SOC constant, which can be expressed as:[1, 2]

$$\langle S_n | H_{SOC} | T_m \rangle = \sum_k {}^1a_i {}^3a_j {}^1c_k {}^3c_k \xi_c \langle {}^1d_k {}^1\pi^* | \hat{l} \cdot \hat{s} | {}^3d_k {}^3\pi^* \rangle \quad (S2)$$

**Table. S1** Calculated and experimental key parameters for complex **1** - **4** at optimized  $S_0$  states and  $T_1$  states.

|                       | <b>1</b> - $S_0$ (theo/exp <sup>a</sup> ) | <b>1</b> - $T_1$ (theo) |
|-----------------------|-------------------------------------------|-------------------------|
| <i>Ir</i> - <i>N1</i> | 2.155 (2.130)                             | 2.128                   |
| <i>Ir</i> - <i>N2</i> | 2.155 (2.130)                             | 2.167                   |
| <i>Ir</i> - <i>N3</i> | 2.155 (2.130)                             | 2.178                   |
| <i>Ir</i> - <i>C1</i> | 2.018 (2.016)                             | 1.974                   |
| <i>Ir</i> - <i>C2</i> | 2.018 (2.016)                             | 2.030                   |
| <i>Ir</i> - <i>C3</i> | 2.017 (2.016)                             | 2.017                   |
|                       | <b>2</b> - $S_0$ (theo)                   | <b>2</b> - $T_1$ (theo) |
| <i>Ir</i> - <i>N1</i> | 2.146                                     | 2.108                   |
| <i>Ir</i> - <i>N2</i> | 2.147                                     | 2.157                   |
| <i>Ir</i> - <i>N3</i> | 2.147                                     | 2.157                   |
| <i>Ir</i> - <i>C1</i> | 2.016                                     | 1.993                   |
| <i>Ir</i> - <i>C2</i> | 2.016                                     | 2.013                   |
| <i>Ir</i> - <i>C3</i> | 2.016                                     | 2.028                   |
|                       | <b>3</b> - $S_0$ (theo)                   | <b>3</b> - $T_1$ (theo) |
| <i>Ir</i> - <i>N1</i> | 2.048                                     | 2.035                   |
| <i>Ir</i> - <i>N2</i> | 2.048                                     | 2.067                   |
| <i>Ir</i> - <i>C1</i> | 1.992                                     | 1.956                   |
| <i>Ir</i> - <i>C2</i> | 1.992                                     | 1.991                   |
| <i>Ir</i> - <i>O1</i> | 2.181                                     | 2.186                   |
| <i>Ir</i> - <i>O2</i> | 2.181                                     | 2.180                   |
|                       | <b>4</b> - $S_0$ (theo/exp <sup>b</sup> ) | <b>4</b> - $T_1$ (theo) |
| <i>Ir</i> - <i>N1</i> | 2.062 (2.059)                             | 2.053                   |
| <i>Ir</i> - <i>N2</i> | 2.049 (2.040)                             | 2.073                   |
| <i>Ir</i> - <i>C1</i> | 1.997 (2.011)                             | 2.019                   |
| <i>Ir</i> - <i>C2</i> | 1.990 (1.992)                             | 2.009                   |
| <i>Ir</i> - <i>O</i>  | 2.152 (2.131)                             | 2.035                   |
| <i>Ir</i> - <i>N3</i> | 2.170 (2.115)                             | 2.139                   |

<sup>a</sup>From ref.3

<sup>b</sup>From ref.4

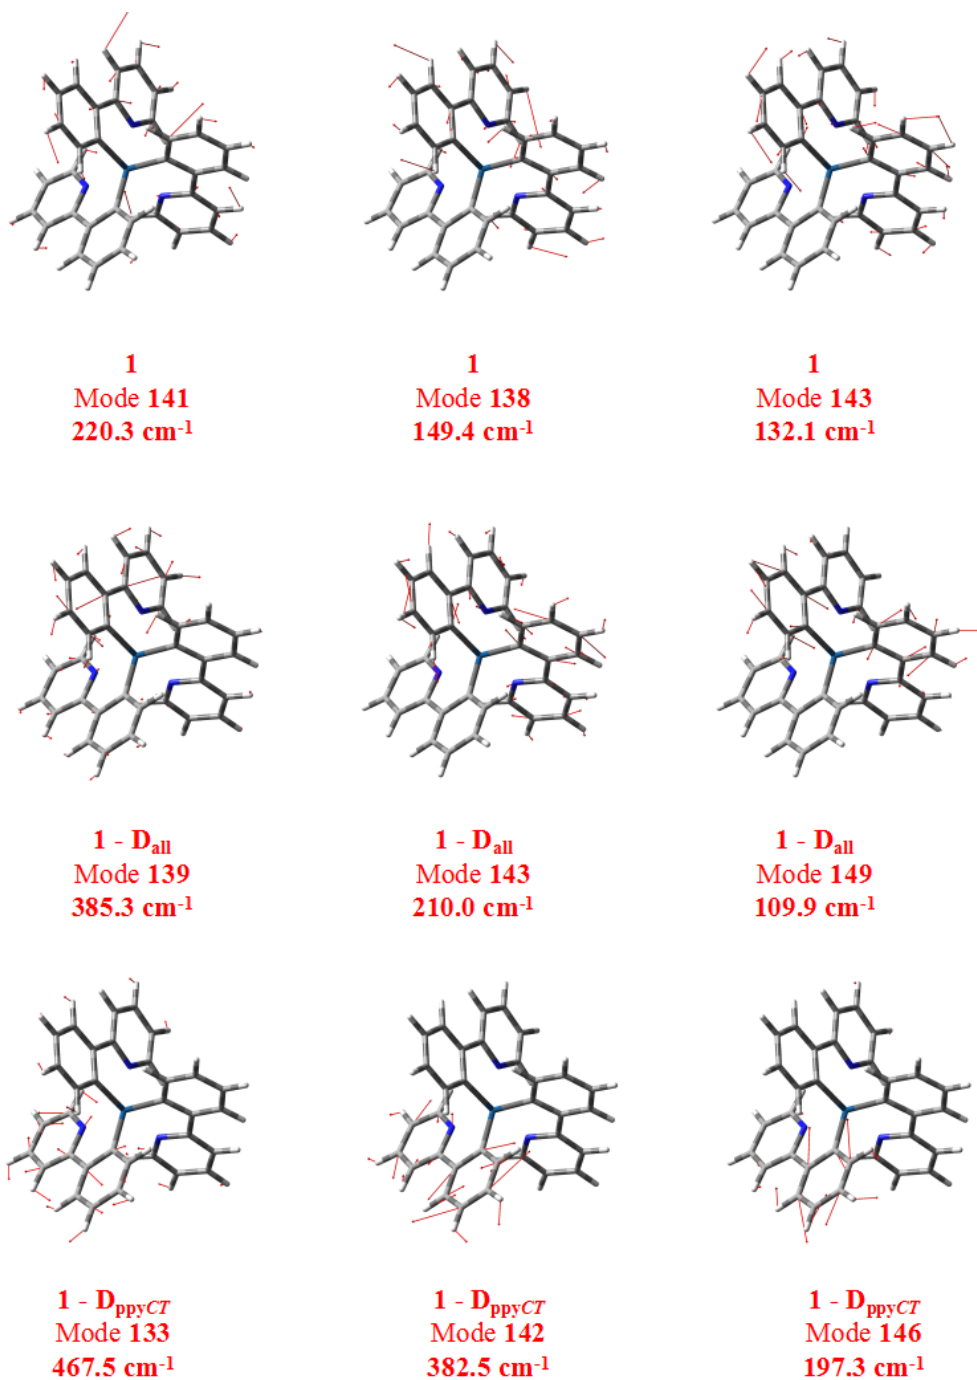

**Fig. S1** Normal mode displacement vectors for the first several largest reorganization energy of complexes **1**, together with its corresponding complete and partial deuterated ones.

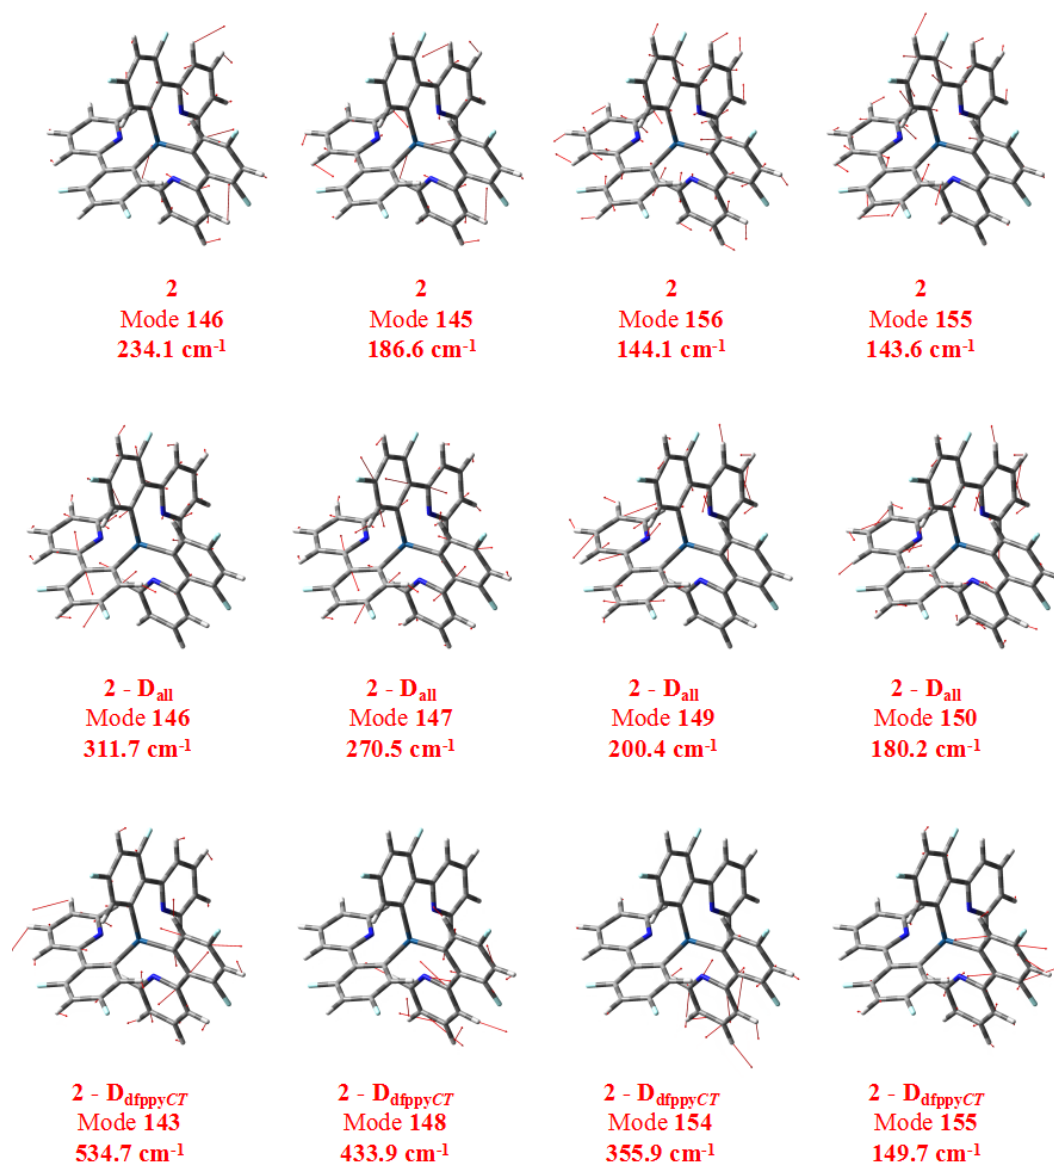

**Fig. S2** Normal mode displacement vectors for the first several largest reorganization energy of complexes **2**, together with its corresponding complete and partial deuterated ones.

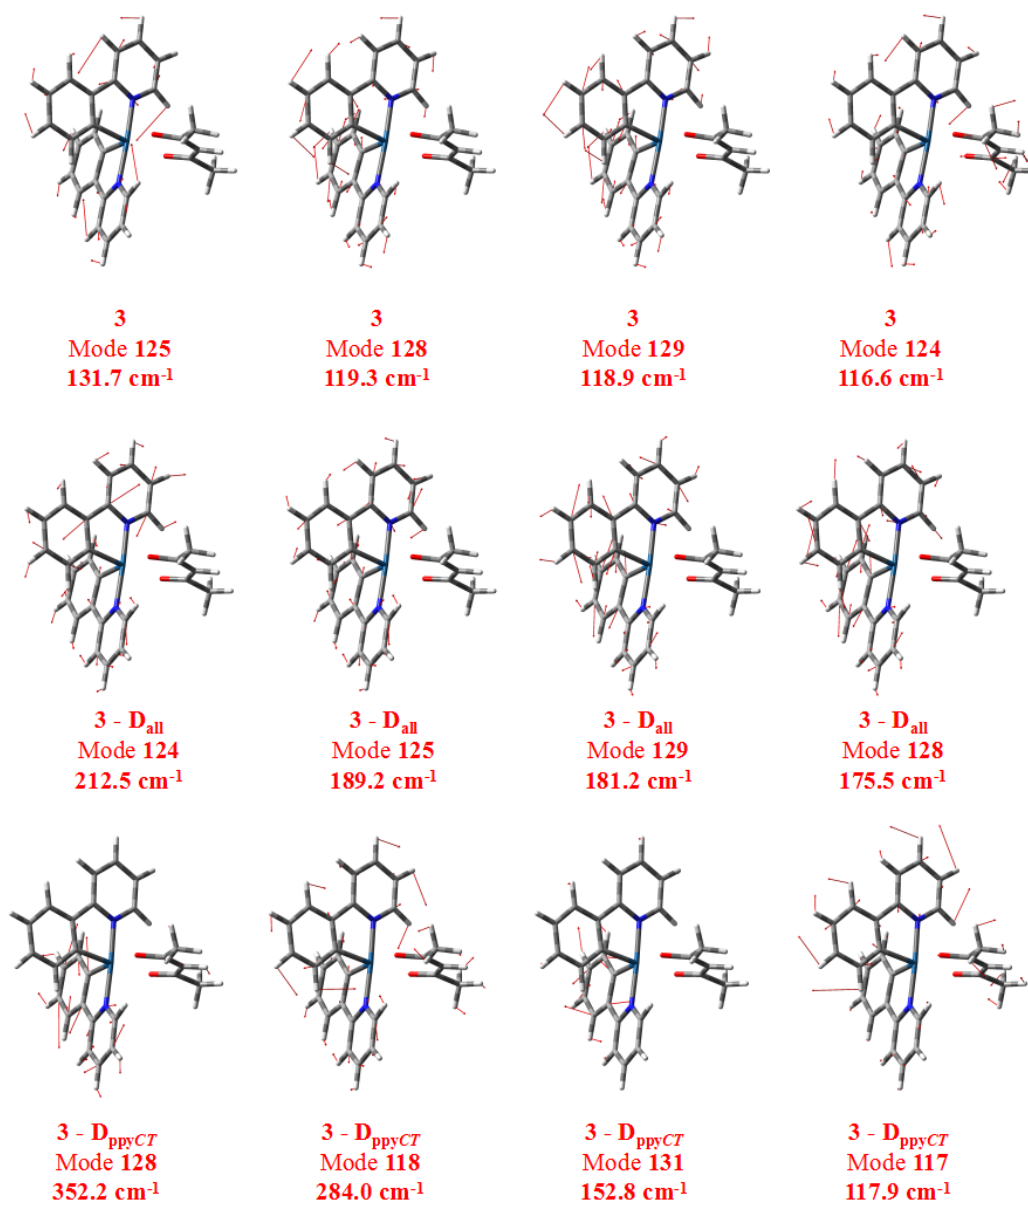

**Fig. S3** Normal mode displacement vectors for the first several largest reorganization energy of complexes **3**, together with its corresponding complete and partial deuterated ones.

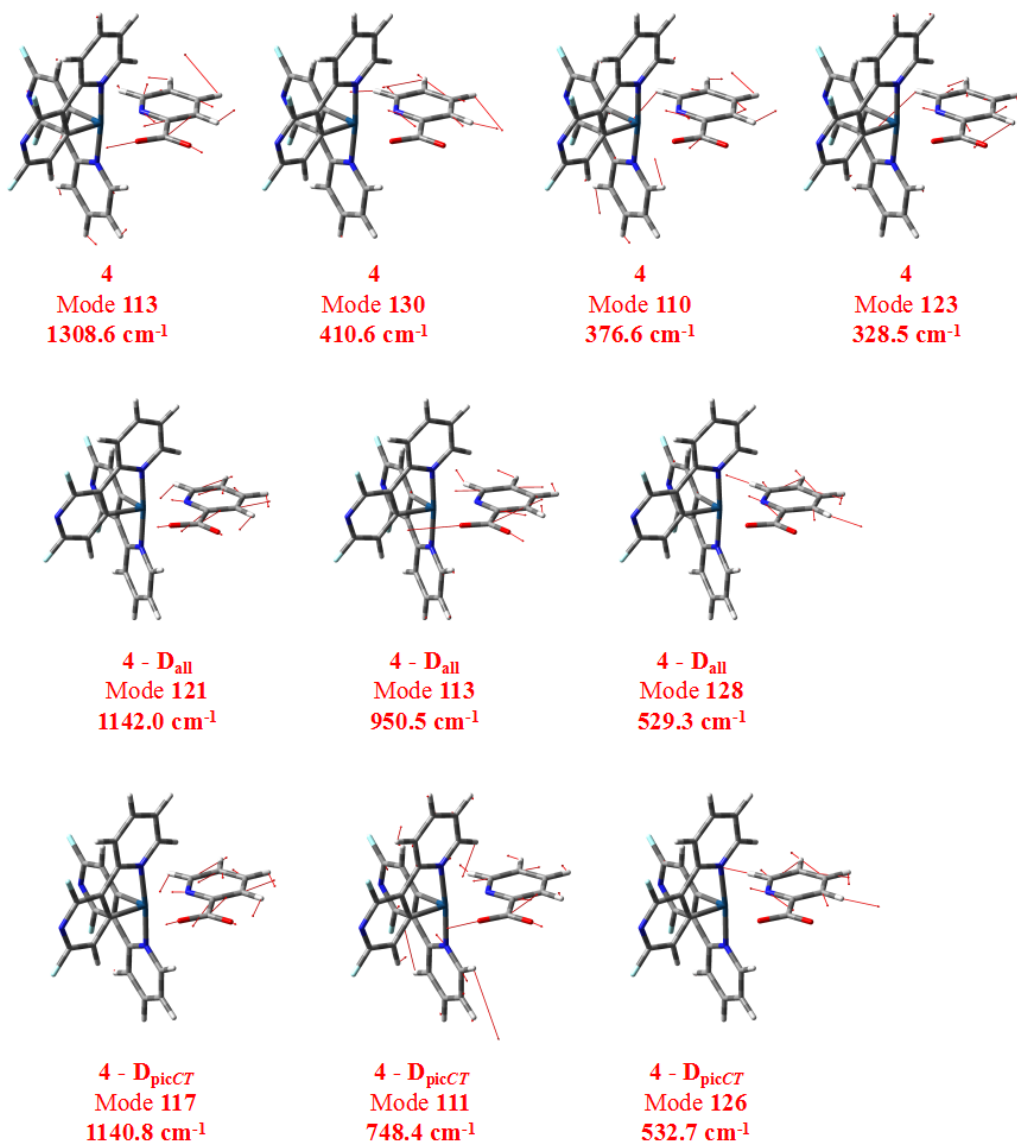

**Fig. S4** Normal mode displacement vectors for the first several largest reorganization energy of complexes **4**, together with its corresponding complete and partial deuterated ones.

## References

- [1] K. Nozaki, *J. Chin. Chem. Soc.*, 2006, **53**, 101–112.
- [2] E. Yu-Tzu Li, T.-Y. Jiang, Y. Chi and P.-T. Chou, *Phys. Chem. Chem. Phys.*, 2014, **16**, 26184–26192.
- [3] R. J. F. Berger, H.-G. Stammer, B. Neumann and N. W. Mitzel, *Eur. J. Inorg. Chem.*, 2010, **2010**, 1613–1617.
- [4] Y. Kang, Y.-L. Chang, J.-S. Lu, S.-B. Ko, Y. Rao, M. Varlan, Z.-H. Lu and S. Wang, *J. Mater. Chem. C*, 2013, **1**, 441–450.
